# Supplementary material for: Designing highly tunable nanostructured peptide hydrogels using differential thermal histories to achieve variable cellular responses
Source: Royal Society of Chemistry journal article supplement (doi:10.1039/d4nr04085f), 2024-12-16
Supplement: d4nr04085f1.pdf [file d4nr04085f1.pdf]

# Designing highly tunable nanostructured peptide hydrogels using differential thermal history to access variable cellular response

Sourav Sen<sup>a</sup>, Sweta Mohanty<sup>a</sup> and Sangita Roy <sup>a\*</sup>

<sup>a</sup>Institute of Nano Science and Technology (INST), Sector 81, Knowledge City, 140306 Mohali,  
Punjab, India

\*Email: sangita@inst.ac.in

**Table S1** Gelation behaviour of the Cbz-FF-OH dipeptide at room temperature with variable thermal history. The peptide solutions were heated at different gelation induction temperature to induce gelation along with the optical images of the solution/hydrogels formed using different thermal history.

**Table S2** Gelation behaviour of collagen.

**Table S3** Fiber diameter of different hydrogels formed by heating at different gelation temperatures 40°C-90°C as revealed from AFM study.

**Table S4** Stress relaxation time ( $\tau_{1/2}$ ) obtained from stress-relaxation curve for different hydrogels at different thermal history and collagen hydrogel.

**Table S5** Fiber diameter of the gel (Gel<sub>50°C</sub>  $\xrightarrow{\Delta}$  80°C), i.e., after the heating of the Gel<sub>50°C</sub> at 80°C for 1 hour, revealed from AFM study.

**Figure S1** Fluorescence microscopic images of (a) ThT control, ThT bound to (b) Gel<sub>40°C</sub>, (c) Gel<sub>50°C</sub>, (d) Gel<sub>60°C</sub>, (e) Gel<sub>70°C</sub>, (f) Gel<sub>80°C</sub>, (g) Gel<sub>90°C</sub> and (h) collagen.

**Figure S2** Amplitude sweep study of (a) Gel<sub>50°C</sub>, (b) Gel<sub>60°C</sub>, (c) Gel<sub>70°C</sub>, (d) Gel<sub>80°C</sub> and (e) Gel<sub>90°C</sub>.

**Figure S3** Morphological analysis of different hydrogels in DMEM at different thermal history, FESEM images of (a) Gel<sub>40°C</sub>, (b) Gel<sub>50°C</sub>, (c) Gel<sub>60°C</sub>, (d) Gel<sub>70°C</sub>, (e) Gel<sub>80°C</sub> and (f) Gel<sub>90°C</sub>.

**Figure S4** (a) MTT assay of the peptide solution, (b) bright field images of cells adhered on peptide solution (Concentration 500 µg/ml)

**Figure S5** Bright field images of cells adhered on (a) control, (b) collagen and different hydrogels with diverse nanostructures (c) Gel\_40°C, (d) Gel\_50°C, (e) Gel\_60°C, (f) Gel\_70°C, (g) Gel\_80°C and (h) Gel\_90°C. (Gel concentration 500 µg/ml)

**Figure S6** (a) Biocompatibility study of collagen and different hydrogels at different gelation induction temperatures on neuroblastoma SH-SY5Y cells. Bright field images of cells adhered on (b) control, (c) collagen and different hydrogels with diverse nanostructures (d) Gel\_40°C, (e) Gel\_50°C, (f) Gel\_60°C, (g) Gel\_70°C, (h) Gel\_80°C and (i) Gel\_90°C. (Gel concentration 500 µg/ml)

**Figure S7** FESEM study of the different hydrogels (a) Gel\_40°C, (b) Gel\_50°C, (c) Gel\_60°C, (d) Gel\_70°C, (e) Gel\_80°C and (f) Gel\_90°C on the surface of the glass after rewetting with media in the 2D cell culture experiment.

**Figure S8** FACS analysis of fibroblast L929 cells (a) in control and after treated with (b) collagen and different gels of Cbz-FF-OH fabricated with variable thermal history (c) Gel\_40°C, (d) Gel\_50°C, (e) Gel\_60°C, (f) Gel\_70°C, (g) Gel\_80°C, (h) Gel\_90°C. Percentage of live and dead cells indicated by the quadrant Q1 and Q3, respectively.

**Figure S9** Biocompatibility study of Cbz-FF-OH peptide hydrogels formed by heating at 50°C and the thermoreversible hydrogel that is formed by melting Gel\_50°C at 80°C for 1 hour followed by cooling to RT to fabricate new hydrogel (Gel\_50°C  $\xrightarrow{\Delta}$  80°C).

**Figure S10** Bright field images of cells adhered on different hydrogels with diverse nanostructures (a) Cbz-FF-OH peptide hydrogels formed by heating at 50°C and (b) the thermoreversible hydrogel that is formed by melting Gel\_50°C at 80°C for 1 hour followed by cooling to RT. (Gel concentration after dilution 500 µg/ml)

**Figure S11** Alamar study of Cbz-FF-OH peptide hydrogels formed by heating at 50°C and the thermoreversible hydrogel that is formed by melting Gel\_50°C at 80°C for 1 hour followed by cooling to RT resulting in new hydrogel (Gel\_50°C  $\xrightarrow{\Delta}$  80°C).

**Table S1** Gelation behaviour of the Cbz-FF-OH dipeptide at room temperature with variable thermal history. The peptide solutions were heated at different gelation induction temperature

to induce gelation along with the optical images of the solution/hydrogels formed using different thermal history.

| [ CbzFFOH ]<br>(mM) | Gelation<br>induction<br>temperature<br>(°C) | Observations<br>after 24 hours | Digital images<br>of the gels                                                         |
|---------------------|----------------------------------------------|--------------------------------|---------------------------------------------------------------------------------------|
| 30                  | 40                                           | Weak Gel                       | 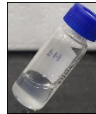   |
| 30                  | 50                                           | Gel                            |    |
| 30                  | 60                                           | Gel                            |   |
| 30                  | 70                                           | Gel                            |  |
| 30                  | 80                                           | Gel                            |  |
| 30                  | 90                                           | Gel                            |  |

**Table S2** Gelation behaviour of collagen.

| Concentration of Collagen | Observation after 24 hours | Digital image of the gel                                                           |
|---------------------------|----------------------------|------------------------------------------------------------------------------------|
| 1 mg/ml                   | Self-supporting hydrogel   |  |

**Table S3** Fiber diameter of different hydrogels formed by heating at different gelation temperatures 40°C-90°C as revealed from AFM study.

| Name of the gels | Fiber diameter (nm) |
|------------------|---------------------|
| Gel_40°C         | 66 ± 4.5            |
| Gel_50°C         | 63 ± 3.5            |
| Gel_60°C         | 55 ± 4.1            |
| Gel_70°C         | 52 ± 2.8            |
| Gel_80°C         | 41 ± 2.1            |
| Gel_90°C         | 39 ± 2.4            |
| Collagen         | 40 ± 3.1            |

**Table S4** Stress relaxation time ( $\tau_{1/2}$ ) obtained from stress-relaxation curve for different hydrogels at different thermal history and collagen hydrogel.

| Name of the gels | Stress relaxation time ( $\tau_{1/2}$ ) (Sec) |
|------------------|-----------------------------------------------|
| Gel_50°C         | 34.008                                        |
| Gel_60°C         | 3.427                                         |
| Gel_70°C         | 4.781                                         |
| Gel_80°C         | 2.447                                         |
| Gel_90°C         | 5.194                                         |
| Collagen         | 0.92                                          |

**Table S5** Fiber diameter of the gel (Gel\_50°C  $\xrightarrow{\Delta}$  80°C), i.e., after the heating of the Gel\_50°C at 80°C for 1 hour, revealed from AFM study.

| Name of the gels                          | Fiber diameter (nm) |
|-------------------------------------------|---------------------|
| $\Delta$<br>(Gel_50°C $\rightarrow$ 80°C) | 43 $\pm$ 3.2        |

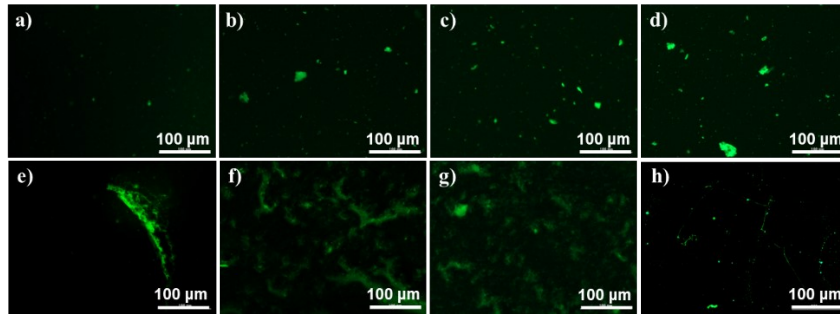

**Figure S1** Fluorescence microscopic images of (a) ThT control, ThT bound to (b) Gel\_40°C, (c) Gel\_50°C, (d) Gel\_60°C, (e) Gel\_70°C, (f) Gel\_80°C, (g) Gel\_90°C, and (h) collagen.

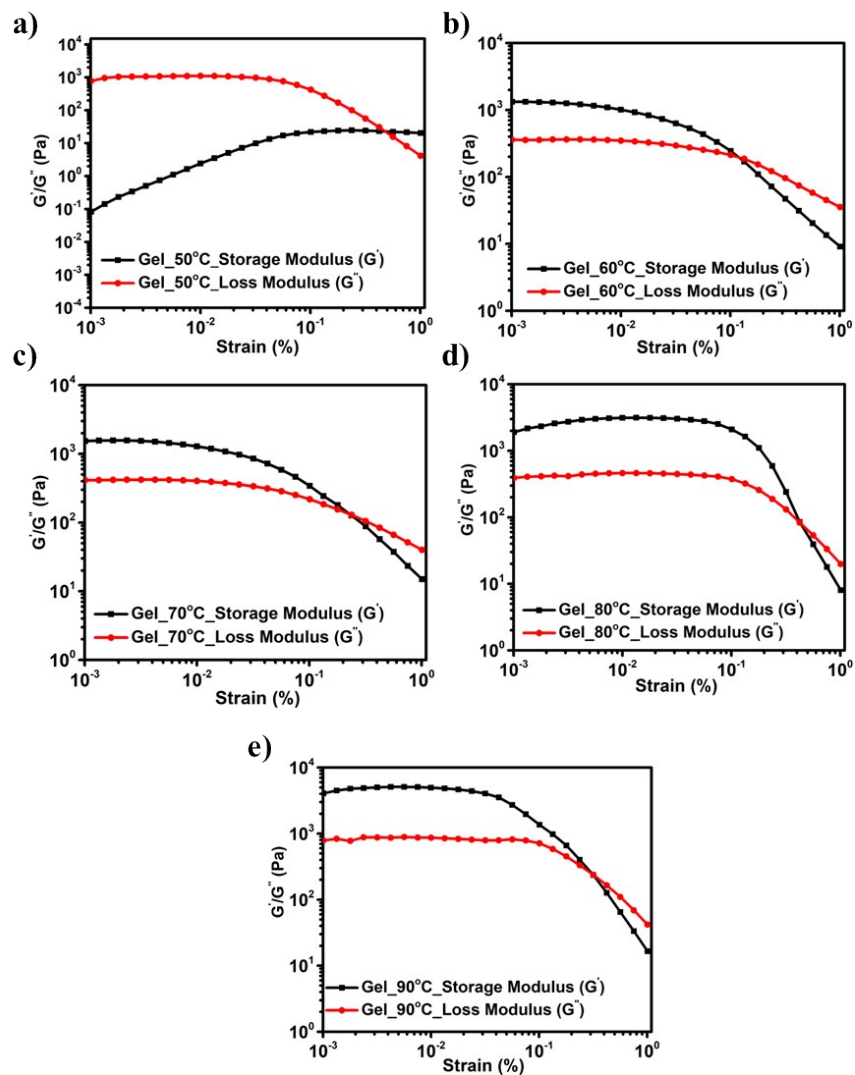

**Figure S2** Amplitude sweep study of (a) Gel\_50°C, (b) Gel\_60°C, (c) Gel\_70°C, (d) Gel\_80°C and (e) Gel\_90°C.

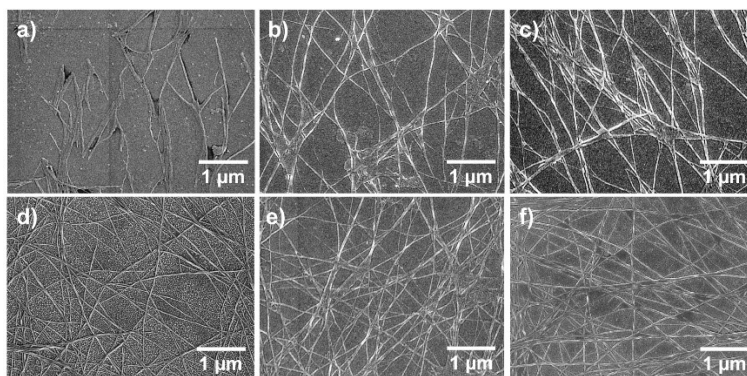

**Figure S3** Morphological analysis of different hydrogels in DMEM at different thermal history, FESEM images of (a) Gel\_40°C, (b) Gel\_50°C, (c) Gel\_60°C, (d) Gel\_70°C, (e) Gel\_80°C and (f) Gel\_90°C.

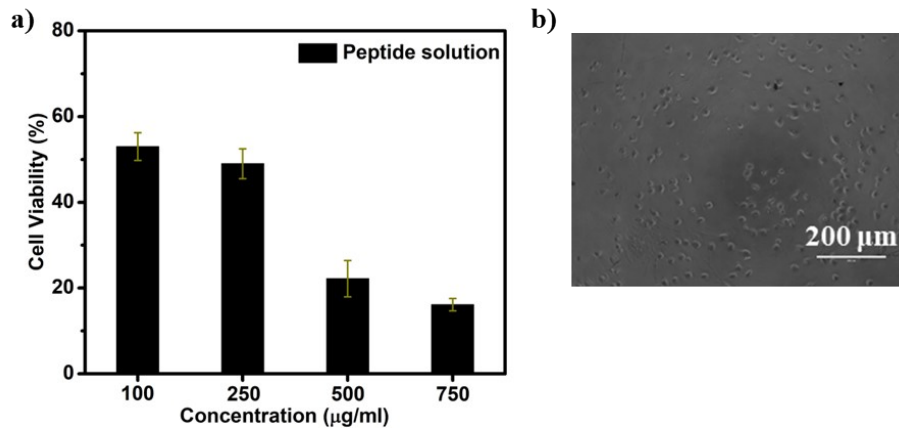

**Figure S4** (a) MTT assay of the peptide solution, (b) bright field images of cells adhered on peptide solution (Concentration 500 µg/ml)

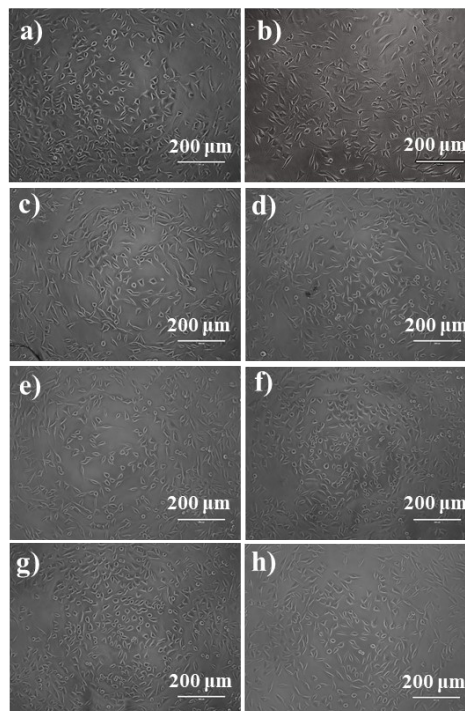

**Figure S5** Bright field images of cells adhered on (a) control, (b) collagen and different hydrogels with diverse nanostructures (c) Gel\_40°C, (d) Gel\_50°C, (e) Gel\_60°C, (f) Gel\_70°C, (g) Gel\_80°C and (h) Gel\_90°C. (Gel concentration 500 µg/ml)

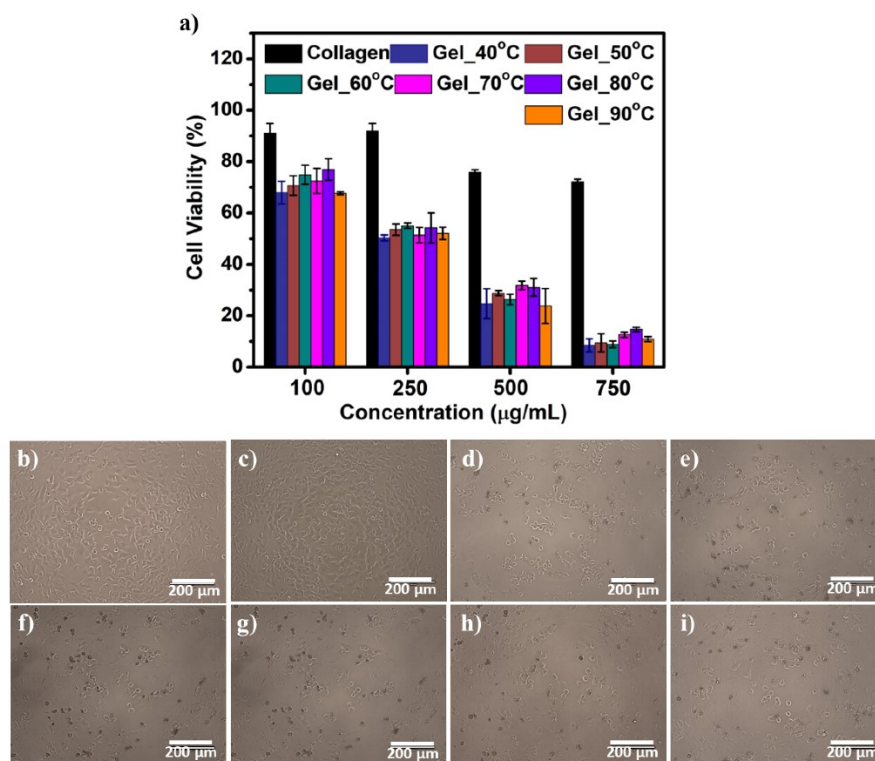

**Figure S6** (a) Biocompatibility study of collagen and different hydrogels at different gelation induction temperatures on neuroblastoma SH-SY5Y cells. Bright field images of cells adhered on (b) control, (c) collagen and different hydrogels with diverse nanostructures (e) (d) Gel\_40°C, (e) Gel\_50°C, (f) Gel\_60°C, (g) Gel\_70°C, (h) Gel\_80°C and (i) Gel\_90°C. (Gel concentration 500 µg/ml)

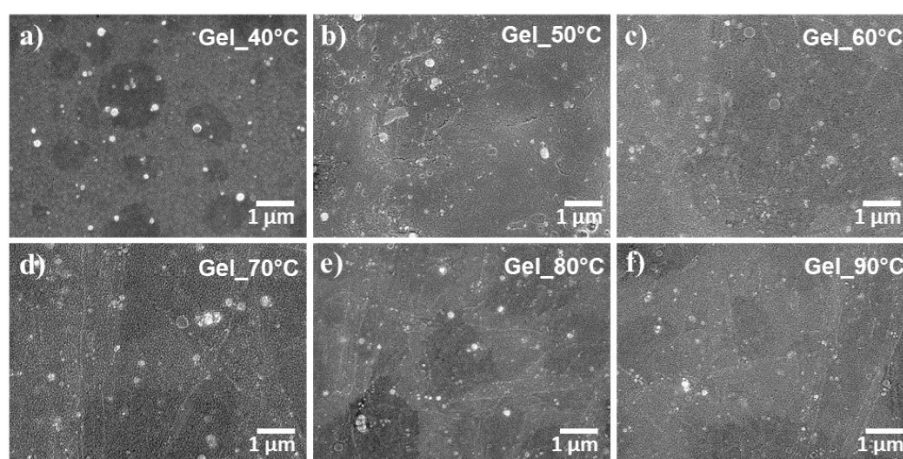

**Figure S7** FESEM study of the different hydrogels (a) Gel\_40°C, (b) Gel\_50°C, (c) Gel\_60°C, (d) Gel\_70°C, (e) Gel\_80°C and (f) Gel\_90°C on the surface of the glass after rewetting with media in the 2D cell culture experiment.



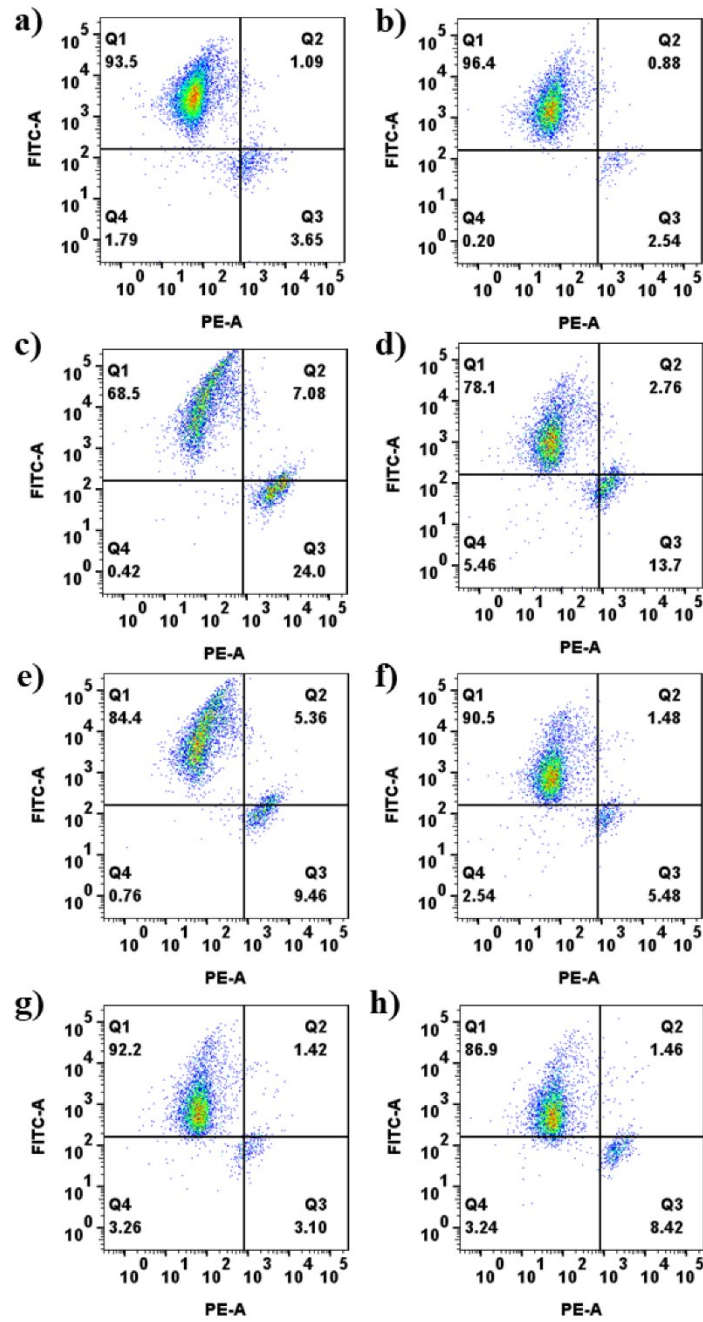

**Figure S8** FACS analysis of fibroblast L929 cells (a) in control and after treated with (b) collagen and different gels of Cbz-FF-OH fabricated with variable thermal history (c) Gel<sub>40°C</sub>, (d) Gel<sub>50°C</sub>, (e) Gel<sub>60°C</sub>, (f) Gel<sub>70°C</sub>, (g) Gel<sub>80°C</sub>, (h) Gel<sub>90°C</sub>. Percentage of live and dead cells indicated by the quadrant Q1 and Q3, respectively.

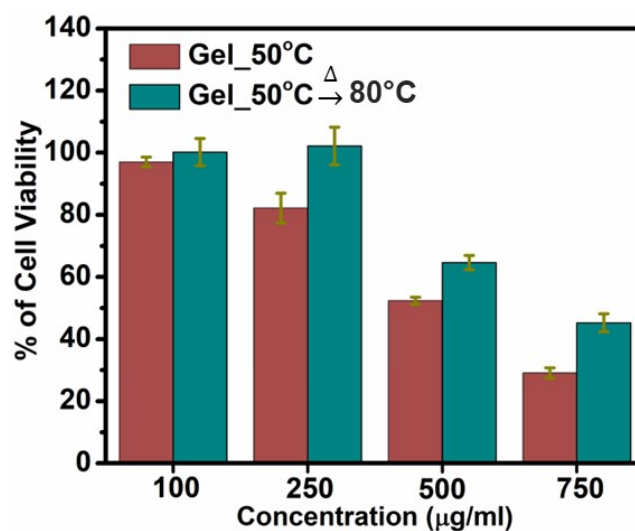

**Figure S9** Biocompatibility study of Cbz-FF-OH peptide hydrogels formed by heating at 50°C and the thermoreversible hydrogel that is formed by melting Gel\_50°C at 80°C for 1 hour followed by cooling to RT to fabricate new hydrogel (Gel\_50°C  $\xrightarrow{\Delta}$  80°C).

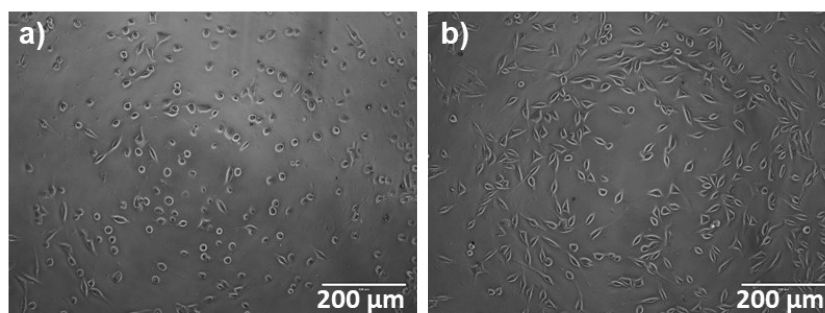

**Figure S10** Bright field images of cells adhered on different hydrogels with diverse nanostructures (a) Cbz-FF-OH peptide hydrogels formed by heating at 50°C and (b) the thermoreversible hydrogel that is formed by melting Gel\_50°C at 80°C for 1 hour followed by cooling to RT. (Gel concentration after dilution 500 µg/ml)

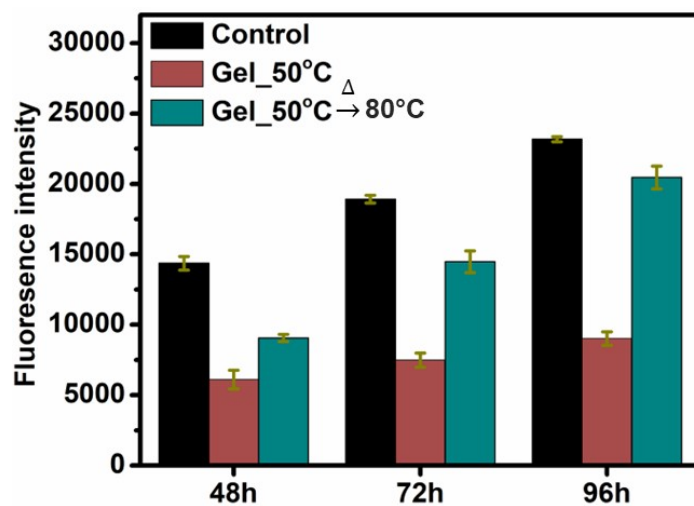

**Figure S11** Alamar study of Cbz-FF-OH peptide hydrogels formed by heating at 50°C and the thermoreversible hydrogel that is formed by melting Gel\_50°C at 80°C for 1 hour followed by cooling to RT resulting in new hydrogel (Gel\_50°C → 80°C).
